# Supplementary material for: Self-assembly and functionalization of alternating copolymer vesicles
Source: Royal Society of Chemistry journal article supplement (doi:10.1039/c7py00908a), 2017-01-01
Supplement: c7py00908a1.pdf [file c7py00908a1.pdf]

## Supporting Information

# Self-assembly and Functionalization of Alternating Copolymer Vesicles

Chuanlong Li,<sup>a</sup> Chuanshuang Chen,<sup>a</sup> Shanlong Li,<sup>a</sup> Tahir Rasheed,<sup>a</sup> Ping Huang,<sup>a</sup> Tong Huang,<sup>a</sup> Yinglin Zhang,<sup>a</sup> Wei Huang,<sup>a\*</sup> and Yongfeng Zhou<sup>a\*</sup>

<sup>a</sup>*School of Chemistry and Chemical Engineering, State Key Laboratory of Metal Matrix Composite, Shanghai Jiao Tong University, Shanghai 200240, China. Fax: (+86) 21 54741297; Email: yfzhou@sjtu.edu.cn*

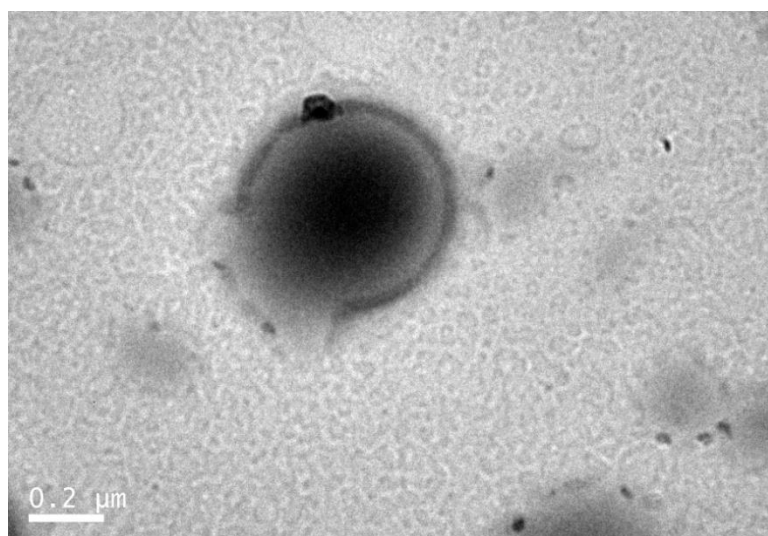

**Fig. S1** TEM image of a fractured vesicle originated from alternating copolymer P(DHO-a-DHBDT).

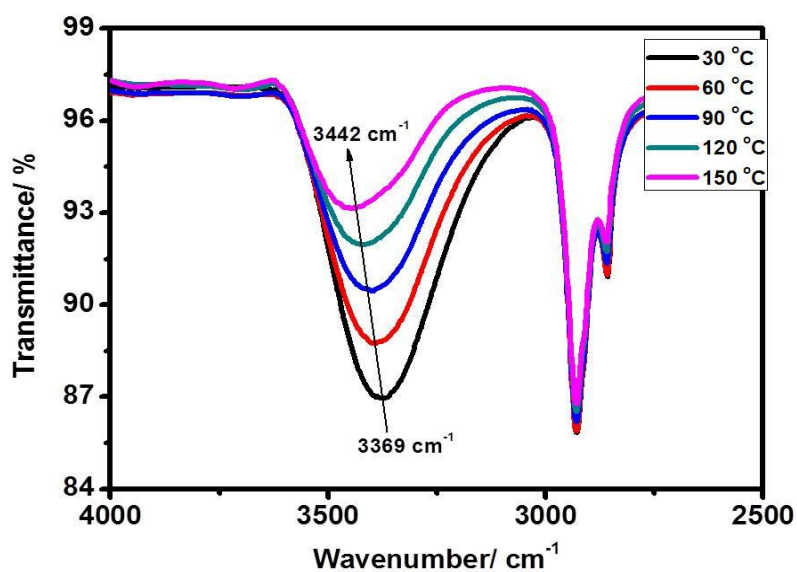

**Fig. S2** Variable temperature FTIR spectra of dried vesicles from P(DHO-a-DHBDT) molecules. With increasing temperature from 30 °C to 150 °C, the peak of the hydroxyl groups gradually became narrower and shifted to the high wavelength side, which clearly indicated that hydroxyl groups had formed hydrogen bonds in the dried P(DHO-a-DHBDT) vesicles.

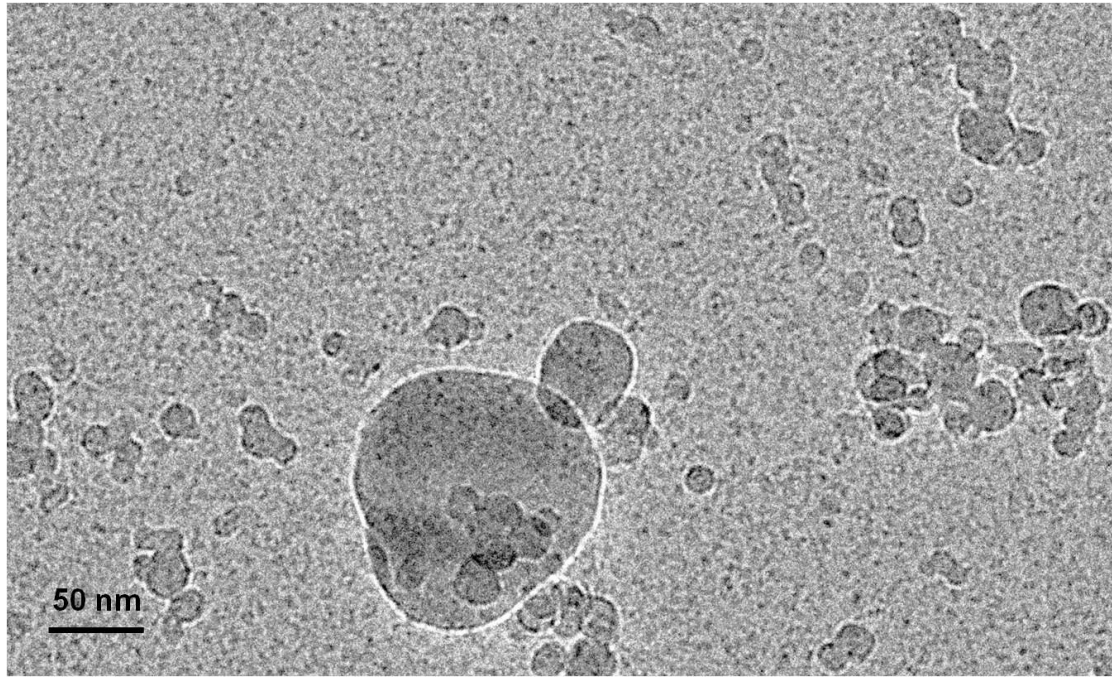

**Fig. S3** The cryo-TEM image of P(DHO-a-DHBDT) alternating copolymer vesicles.

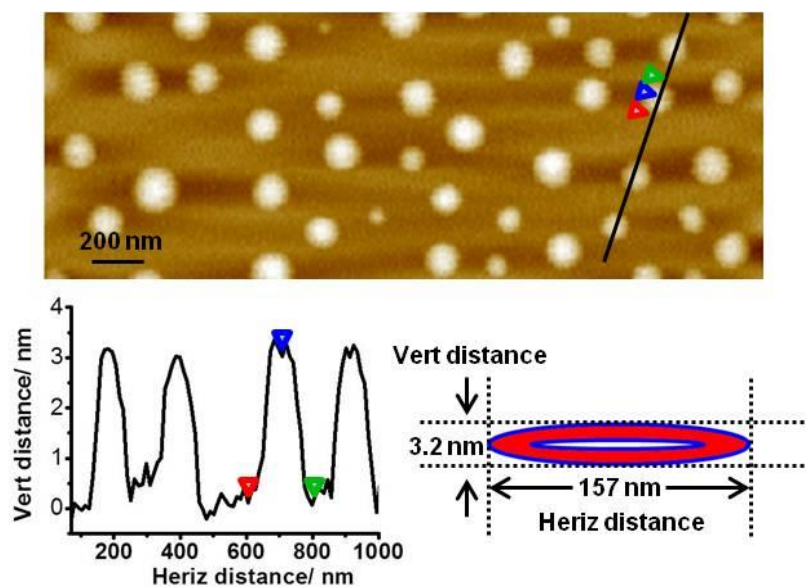

**Fig. S4** The AFM cross section analyses for P(DHO-a-DHBDT) vesicles. Botom left is the line profile of the selected cross section. Botom right is a cartoon illustration of cross section of a collapsed vesicle. The sample was prepared with a lower concentration. In particular, 10  $\mu\text{L}$  1 mg/mL DMF solution of P(DHO-a-DHBDT) was injected into 1 mL deionized water to trigger self-assembly. One drop of the vesicle solution was added onto the surface of fresh cleaved mica, then a filtrate paper was used to absorb redundant water leaving a thin water film on mica plate. After that, the sample was dried under vacuum at room temperature for 24 h and then at 60  $^{\circ}\text{C}$  for another 24 h to make the vesicles collapsed completely onto the surface of mica.
